# Supplementary material for: Rosaceae, Brassicaceae and Pollen Beetles: exploring relationships and evolution in an anthophilous beetle lineage (Nitidulidae, Meligethes-complex of genera) using an integrative approach&nbsp;
Source: Research Square preprint supplement (doi:10.21203/rs.3.rs-37852/v2), 2020-11-03
Supplement: Supplementary file 1 [file ad4aa226f788d0f07ed9960c.xlsx]

## Sheet: Foglio1
Species	Sample ID	Localities
Meligethes auripilis	MAU1_1	China- Sichuan, Kangding co
Meligethes auripilis	MAU1_2	China- Sichuan, Kangding co
Meligethes auropilosus	MAURO1_1	China- Hubei, Shennongjia Forest, Shennong Peak area
Meligethes binotatus	MBI1_1	China- Sichuan-Xiangcheng co.
Meligethes chinensis	4C2	China- Chongqing, Shizhu, Huangshui
Meligethes elytralis	MEL1_1	China- Sichuan, Xiangcheng co
Meligethes ferruginoides	MFE1_1	China- Sichuan-Moxi-Yanzigou
Meligethes hammondi	MHA 1_1	China- Hubei, Shennongjia forest, Muyu
Meligethes luteomaculatus	MLU1_1	China- Hubei, Shennongjia Forest, Shennong Peak area
Meligethes macrofemoratus	MMA1_1	China- Hubei, Shennongjia forest
Meligethes pallidoelytrorum	MPA2_1	China-Sichuan-Ganzi-Moxi Town
Meligethes pectoralis	MPEC1_1	China- Guizhou-Tongzi-Louguan-Mts-Wanmuhuahai
Meligethes pectoralis	MPEC1_2	China- Guizhou-Tongzi-Louguan-Mts-Wanmuhuahai
Meligethes pseudochinensis	4A10	China- Hubei, Shennongjia forest, Muyu
Meligethes pseudochinensis	4C5	China- Chongqing, Shizhu, Huangshui
Meligethes semenovi	2C41	China- Tibet, Shannan, Cuona, Gongri
Meligethes semenovi	2C42	China- Tibet, Shannan, Cuona, Gongri
Meligethes scrobescens	4B7	China- Chongqing, Shizhu, Huangshui
Meligethes transmissus	MTR1_1	China- Sichuan, Kangding co
Meligethes violaceus	MVI1_1	China- Zhejiang-Quzhou City-Jiangshan City
Meligethes wagneri	4C4	China- Chongqing, Shizhu, Huangshui
Meligethes xenogynus	3A31	China- Shaanxi, Meixian, Haoping temple
Meligethes xenogynus	3A32	China- Shaanxi, Meixian, Haoping temple
Brassicogethes coracinus	CR8_1	Turkey-Ardahan-road between Göle and Susuz
Brassicogethes aeneus	BAE13_3	Italy- Lazio- Pomezia - Borgo di pratica di mare
Brassicogethes aeneus	BAE13_4	Italy- Lazio- Pomezia - Borgo di pratica di mare
Brassicogethes salvan	BSA1.1	Italy- Piemonte- Mt.Palafrè- Lago inf. Del Frisson
Meligethinus peringueyi	MEP1_1	Mozambique- Maputo,Reserva Especial
Meligethinus dolosus	MED1_2	Mozambique- Maputo,Reserva Especial
