# Supplementary material for: Rosaceae, Brassicaceae and Pollen Beetles: exploring relationships and evolution in an anthophilous beetle lineage (Nitidulidae, Meligethes-complex of genera) using an integrative approach&nbsp;
Source: Research Square preprint supplement (doi:10.21203/rs.3.rs-37852/v2), 2020-11-03
Supplement: Supplementary file 3 [file dc9c2dd1604171548f337ce3.xlsx]

## Sheet: Foglio1
	1	2	3	4	5	6	7	8	9	10	11	12	13	14	15	16	17	18	19	20	21	22	23	24	25	26	27	28	29	30	31	32	33	34	35	36	37	38	39	40	41	42	43	44	45	46	47	48	49
Thymogethes egenus	0	0	-	0	-	0	0	-	0	0	-	0	-	0	1	1	0	0	0	-	0	0	0	0	0	0	1	0	1	0	1	-	0	0	-	0	0	1	-	1	1	1	0	0	-	1	0	1	0
Tarchonanthogethes fasciatus	0	0	-	0	-	0	0	-	0	0	-	0	-	0	1	1	0	0	0	0	0	1	-	0	0	0	1	0	1	0	1	-	0	0	-	0	0	1	-	0	-	0	0	0	-	1	0	1	0
Chromogethes splendidulus	0	2	-	0	-	0	0	-	0	0	-	0	-	0	1	0	-	0	0	0	0	1	-	0	0	1	0	0	0	0	1	-	0	0	-	0	0	0	1	0	-	0	0	0	-	1	0	1	0
Restiopria biondii	0	0	-	0	-	0	0	-	0	0	-	0	-	1	1	0	-	0	0	1	0	1	-	0	0	0	0	0	0	0	1	-	1	0	-	0	0	0	1	0	-	2	0	0	-	1	0	1	1
Pria dulcamarae	0	0	-	0	-	0	0	-	0	0	-	0	-	1	0	0	-	0	0	1	0	1	-	2	0	1	0	0	0	0	0	0	1	1	-	2	0	0	1	0	-	0	0	0	-	1	1	-	1
Meligethinus pallidulus	0	0	-	0	-	0	0	-	0	0	-	0	-	1	0	0	-	0	0	0	0	1	-	0	0	1	0	0	0	1	1	-	1	1	-	0	0	0	1	0	-	0	1	0	-	1	0	1	0
Meligethinus peringueyi	0	0	-	0	-	0	0	-	0	0	-	0	-	1	0	0	-	0	0	0	0	1	-	0	0	1	0	0	0	1	1	-	1	1	-	0	0	0	1	0	-	0	1	0	-	1	0	1	0
Meligethinus dolosus	0	0	-	0	-	0	0	-	0	0	-	0	-	1	0	0	-	0	0	0	0	1	-	2	0	1	0	0	0	0	1	-	1	1	-	0	1	0	1	0	-	0	1	0	-	1	0	1	0
Brassicogethes aeneus	0	2	-	0	-	0	0	-	0	0	-	0	-	1	1	0	-	0	0	0	0	1	-	0	0	1	0	0	0	0	0	0	0	1	-	0	0	0	1	0	-	0	1	0	-	1	0	0	0
Brassicogethes salvan	0	2	-	0	-	0	0	-	0	0	-	0	-	1	1	0	-	0	0	0	0	1	-	0	0	1	0	0	0	0	0	0	0	1	-	0	0	0	1	0	-	0	1	0	-	1	0	0	0
Brassicogethes coracinus	0	0	-	0	-	0	0	-	0	0	-	0	-	1	1	0	-	0	0	0	0	1	-	0	0	1	0	0	0	0	0	0	0	1	-	0	0	0	1	0	-	0	1	0	-	1	0	0	0
Meligethes argentithorax	0	0	-	0	-	1	1	0	0	1	-	1	0	1	1	0	-	1	0	0	0	1	-	2	0	1	0	1	0	0	1	-	0	1	-	2	0	0	1	0	-	0	0	0	-	1	0	0	0
Meligethes atratus	0	0	-	0	-	0	1	0	0	0	-	1	0	1	1	0	-	0	0	0	0	1	-	2	0	1	0	0	0	0	1	-	0	1	-	2	0	0	1	0	-	0	0	0	-	0	0	0	0
Meligethes aureolineatus	0	0	-	0	-	0	1	1	0	0	-	1	0	1	1	0	-	0	0	0	0	1	-	2	0	1	0	1	0	0	1	-	0	1	-	2	0	0	1	0	-	0	0	0	-	0	0	0	0
Meligethes auricomus	0	0	-	1	-	0	1	0	0	1	-	1	0	1	1	0	-	0	0	0	0	1	-	2	0	1	0	1	0	0	1	-	0	1	-	2	0	0	1	0	-	0	0	0	-	0	0	0	0
Meligethes aurifer	0	0	-	0	-	0	1	1	0	0	-	1	0	1	1	0	-	0	0	0	0	1	-	2	0	1	0	1	0	0	1	-	0	1	-	2	0	0	1	0	-	0	0	0	-	0	0	0	0
Meligethes auripilis	0	0	-	0	-	1	1	0	0	1	-	1	0	1	1	0	-	1	0	0	0	1	-	2	0	1	0	1	0	0	1	-	0	1	-	2	0	0	1	0	-	0	0	0	-	1	0	0	0
Meligethes auropilosus	0	0	-	0	-	0	0	-	1	0	-	1	0	1	1	0	-	0	0	0	0	1	-	2	0	1	0	0	0	0	1	-	0	1	-	2	0	0	1	0	-	0	0	0	-	1	0	0	0
Meligethes binotatus	0	0	-	1	-	0	1	0	0	1	-	1	0	1	1	0	-	0	0	0	0	1	-	2	0	1	0	1	0	0	1	-	0	1	-	2	0	0	1	0	-	0	0	0	-	0	0	0	0
Meligethes cinereoargenteus	0	0	-	0	-	0	1	1	0	0	-	1	0	1	1	0	-	1	0	0	0	1	-	2	0	1	0	1	0	0	1	-	0	1	-	2	0	0	1	0	-	0	0	0	-	1	0	0	0
Meligethes cinereus	0	0	-	0	-	0	0	-	1	0	-	1	0	1	1	0	-	0	0	0	0	1	-	2	0	1	0	0	0	0	1	-	0	1	-	2	1	0	1	0	-	0	0	0	-	1	0	0	0
Meligethes clinei	0	0	-	0	-	1	0	-	0	0	-	1	0	1	1	0	-	0	0	0	0	1	-	2	0	1	0	1	0	0	1	-	0	1	-	2	0	0	1	0	-	0	0	0	-	1	0	0	0
Meligethes cyaneus	1	0	-	0	-	0	0	-	0	0	-	1	0	1	1	0	-	0	0	0	0	1	-	2	0	1	0	0	1	0	1	-	0	0	-	2	0	0	1	0	-	0	0	0	-	0	0	0	0
Meligethes elytralis	0	0	-	1	-	0	1	0	0	1	-	1	0	1	1	0	-	1	0	0	0	1	-	2	0	1	0	1	0	0	1	-	0	1	-	2	1	0	1	0	-	0	0	0	-	0	0	0	0
Meligethes flavimanus	0	0	-	0	-	0	1	0	0	0	-	1	0	1	1	0	-	0	0	0	0	1	-	2	0	1	0	0	0	0	1	-	0	1	-	2	0	0	1	0	-	0	0	0	-	0	0	0	0
Meligethes griseus	0	0	-	0	-	0	0	-	1	0	-	1	0	1	1	0	-	0	0	0	0	1	-	2	0	1	0	0	0	0	1	-	0	1	-	1	1	0	1	0	-	0	0	0	-	1	0	0	0
Meligethes hammondi	0	0	-	0	-	0	0	-	0	0	-	1	0	1	1	0	-	0	0	0	0	1	-	2	0	1	0	0	0	0	1	-	0	1	-	2	0	0	1	0	-	0	0	0	-	0	0	0	0
Meligethes macrofemoratus	0	0	-	0	-	1	0	-	0	1	-	1	0	1	1	0	-	0	0	0	0	1	-	2	0	1	0	1	0	0	1	-	0	1	-	2	0	0	1	0	-	0	0	0	-	1	0	0	0
Meligethes marmota	0	0	-	1	-	0	0	-	0	1	-	1	0	1	1	0	-	0	0	0	0	1	-	2	0	1	0	1	0	0	1	-	0	1	-	2	0	0	1	0	-	0	0	0	-	1	0	0	0
Meligethes nepalensis	0	0	-	0	-	0	0	-	1	0	-	1	0	1	1	0	-	0	0	0	0	1	-	2	0	1	0	0	0	0	1	-	0	1	-	1	0	0	1	0	-	0	0	0	-	1	0	0	0
Meligethes nivalis	0	0	-	1	-	0	1	0	0	1	-	1	0	1	1	0	-	1	1	0	0	1	-	2	0	1	0	1	0	0	1	-	0	1	-	2	0	0	1	0	-	0	0	0	-	0	0	0	0
Meligethes semenovi	0	0	-	1	-	0	1	0	0	1	-	1	0	1	1	0	-	0	0	0	0	1	-	2	0	1	0	1	0	0	1	-	0	1	-	2	0	0	1	0	-	0	0	0	-	0	0	0	0
Meligethes stenotarsus	0	0	-	1	-	0	1	0	0	1	-	1	0	1	1	0	-	1	0	0	0	1	-	2	0	1	0	1	0	0	1	-	0	1	-	2	0	0	1	0	-	0	0	0	-	0	0	0	0
Meligethes torquatus	1	0	-	0	-	0	1	0	0	0	-	1	0	1	1	0	-	0	0	0	0	1	-	2	0	1	0	0	1	0	1	-	0	1	-	2	0	0	1	0	-	0	0	0	-	0	0	0	0
Meligethes transmissus	0	0	-	1	-	0	1	0	0	1	-	1	0	1	1	0	-	0	0	0	0	1	-	2	0	1	0	1	0	0	1	-	0	1	-	2	0	0	1	0	-	0	0	0	-	0	0	0	0
Meligethes tryznai	0	0	-	1	-	0	1	0	0	1	-	1	0	1	1	0	-	1	0	0	0	1	-	2	0	1	0	1	0	0	1	-	0	1	-	2	0	0	1	0	-	0	0	0	-	0	0	0	0
Meligethes violaceus	1	0	-	0	-	0	1	0	0	0	-	1	0	1	1	0	-	0	0	0	0	1	-	2	0	1	0	0	1	0	1	-	0	1	-	2	0	0	1	0	-	0	0	0	-	0	0	0	0
Meligethes volkovichi	0	0	-	0	-	0	0	-	1	0	-	1	0	1	1	0	-	0	0	0	0	1	-	2	0	1	0	0	0	0	1	-	0	1	-	1	0	0	1	0	-	0	0	0	-	1	0	0	0
Meligethes yak	0	0	-	1	-	0	1	0	0	1	-	1	0	1	1	0	-	1	1	0	0	1	-	2	0	1	0	1	0	0	1	-	0	1	-	2	?	0	1	0	-	0	0	0	-	0	0	0	0
Meligethes lutra	0	0	-	0	-	0	0	-	0	0	-	1	0	1	1	0	-	0	0	0	0	1	-	1	0	1	0	0	0	1	1	-	0	1	-	1	0	0	1	0	-	0	0	0	-	0	0	0	0
Meligethes martes	0	0	-	0	-	0	0	-	0	0	-	1	0	1	1	0	-	0	0	0	0	1	-	1	0	1	0	0	0	1	1	-	0	1	-	1	0	0	1	0	-	0	0	0	-	0	0	0	0
Meligethes melleus	0	0	-	0	-	0	0	-	0	0	-	1	0	1	1	0	-	0	0	0	0	1	-	1	0	1	0	0	0	1	1	-	0	1	-	1	0	0	1	0	-	0	0	0	-	0	0	0	0
Meligethes vulpes	0	0	-	0	-	0	0	-	0	0	-	1	0	1	1	0	-	0	0	0	0	1	-	1	0	1	0	0	0	1	1	-	0	1	-	1	0	0	1	0	-	0	0	0	-	0	0	0	0
Meligethes aurantirugosus	0	0	0	-	0	-	-	-	-	0	1	1	1	1	1	1	0	0	2	0	2	0	0	0	0	1	0	-	0	0	0	1	0	0	2	0	0	0	0	0	-	0	0	1	1	1	0	0	0
Meligethes aurorugosus	0	0	0	-	0	-	-	-	-	0	1	1	1	1	1	1	0	0	2	0	2	0	0	0	0	1	0	-	0	0	0	1	0	0	2	0	0	0	0	0	-	0	0	1	1	1	0	0	0
Meligethes bourdilloni	0	0	1	-	0	-	-	-	-	0	0	1	1	1	1	1	0	0	2	0	2	0	0	0	0	1	0	-	0	0	0	1	0	0	1	0	0	0	0	0	-	0	0	1	1	0	0	0	0
Meligethes brassicogethoides	0	0	1	-	0	-	-	-	-	0	0	1	1	1	1	1	0	0	2	0	2	0	0	0	1	1	0	-	0	0	0	1	0	0	1	0	0	0	0	0	-	0	0	1	1	1	0	0	0
Meligethes castanescens	0	0	0	-	1	-	-	-	-	0	1	1	1	1	1	1	1	0	2	0	2	0	1	0	0	1	0	-	0	0	0	1	0	0	0	0	0	0	0	0	-	0	0	1	1	0	0	0	0
Meligethes chinensis	0	0	1	-	0	-	-	-	-	0	0	1	1	1	1	1	0	0	2	0	2	0	0	0	0	1	0	-	0	0	0	1	0	0	1	0	0	0	0	0	-	0	0	1	1	1	0	0	0
Meligethes denticulatus	0	0	0	-	0	-	-	-	-	0	0	1	1	1	1	1	0	0	2	0	2	0	0	0	0	1	0	-	0	0	0	1	0	0	0	0	0	0	0	0	-	0	0	1	1	0	0	0	0
Meligethes ferrugineus	0	0	0	-	1	-	-	-	-	0	1	1	1	1	1	1	1	0	2	0	2	0	1	0	0	1	0	-	0	0	0	1	0	0	0	0	0	0	0	0	-	0	0	1	1	0	0	0	0
Meligethes ferruginoides	0	0	0	-	1	-	-	-	-	0	1	1	1	1	1	1	1	0	2	0	2	0	1	0	0	1	0	-	0	0	0	1	0	0	0	0	0	0	0	0	-	0	0	1	1	0	0	0	0
Meligethes flavicollis	0	1	0	-	0	-	-	-	-	0	-	1	1	1	1	1	0	0	2	0	1	0	0	0	0	1	0	-	0	0	0	1	0	0	2	0	0	0	1	0	-	0	0	1	0	0	0	0	0
Meligethes henan	0	0	1	-	0	-	-	-	-	0	0	1	1	1	1	1	0	0	2	0	2	0	0	0	0	1	0	-	0	0	0	1	0	0	1	0	0	0	0	0	-	0	0	1	1	1	0	0	0
Meligethes inexpectatus	0	0	1	-	0	-	-	-	-	0	0	1	1	1	1	1	0	0	2	0	2	0	0	0	0	1	0	-	0	0	0	1	0	0	1	0	0	0	0	0	-	0	0	1	1	1	0	0	0
Meligethes lloydi	0	1	0	-	0	-	-	-	-	0	0	1	1	1	1	1	0	0	2	0	2	0	0	0	0	1	0	-	0	0	0	1	0	0	0	0	0	0	0	0	-	0	0	1	1	1	0	0	0
Meligethes luteomaculatus	0	0	1	-	2	-	-	-	-	0	0	1	1	1	1	1	0	0	2	0	2	0	0	0	0	1	0	-	0	0	0	1	0	0	1	0	0	0	0	0	-	0	0	1	1	1	0	0	0
Meligethes luteoornatus	0	0	1	-	0	-	-	-	-	0	1	1	1	1	1	1	0	0	2	0	2	0	0	0	0	1	0	-	0	0	0	1	0	0	1	0	0	0	0	0	-	0	0	1	1	1	0	0	0
Meligethes nigroaeneus	0	0	0	-	0	-	-	-	-	0	1	1	1	1	1	1	0	0	2	0	2	0	0	0	0	1	0	-	0	0	0	1	0	0	1	0	0	0	0	0	-	0	0	1	1	1	0	0	0
Meligethes occultus	0	0	1	-	0	-	-	-	-	0	0	1	1	1	1	1	0	0	2	0	2	0	0	0	1	1	0	-	0	0	0	1	0	0	1	0	0	0	0	0	-	0	0	1	1	1	0	0	0
Meligethes pallidoelytrorum	0	0	1	-	2	-	-	-	-	0	0	1	1	1	1	1	0	0	2	0	2	0	0	0	0	1	0	-	0	0	0	1	0	0	1	0	0	0	0	0	-	0	0	1	1	1	0	0	0
Meligethes sp. n. cfr. pectoralis	0	1	0	-	0	-	-	-	-	0	0	1	1	1	1	1	0	0	2	0	2	0	0	0	0	1	0	-	0	0	0	1	0	0	1	0	0	0	0	0	-	0	0	1	1	0	0	0	0
Meligethes pectoralis	0	1	0	-	0	-	-	-	-	0	0	1	1	1	1	1	0	0	2	0	2	0	0	0	0	1	0	-	0	0	0	1	0	0	2	0	0	0	0	0	-	0	0	1	1	0	0	0	0
Meligethes pseudochinensis	0	0	1	-	0	-	-	-	-	0	0	1	1	1	1	1	0	0	2	0	2	0	0	0	0	1	0	-	0	0	0	1	0	0	1	0	0	0	0	0	-	0	0	1	1	1	0	0	0
Meligethes pseudopectoralis	0	1	0	-	0	-	-	-	-	0	1	1	1	1	1	1	0	0	2	0	2	0	0	0	0	1	0	-	0	0	0	1	0	0	0	0	0	0	0	0	-	0	0	1	1	0	0	0	0
Meligethes sadanarii	0	1	0	-	0	-	-	-	-	0	0	1	1	1	1	1	0	0	2	0	2	0	0	0	0	1	0	-	0	0	0	1	0	0	0	0	0	0	0	0	-	0	0	1	1	0	0	0	0
Meligethes schuelkei	0	0	1	-	0	-	-	-	-	0	0	1	1	1	1	1	0	0	0	0	2	0	0	0	1	1	0	-	0	0	0	1	0	0	1	0	0	0	0	0	-	0	0	1	1	1	0	0	0
Meligethes scrobescens	0	0	1	-	0	-	-	-	-	0	0	1	1	1	1	1	0	0	2	0	1	0	0	0	0	1	0	-	0	0	0	1	0	0	1	0	0	0	0	0	-	0	0	1	1	1	0	0	0
Meligethes shirakii	0	0	0	-	1	-	-	-	-	0	0	1	1	1	1	1	1	0	2	0	2	0	0	0	0	1	0	-	0	0	0	1	0	0	0	0	0	0	0	0	-	0	0	1	1	0	0	0	0
Meligethes simulator	0	0	1	-	2	-	-	-	-	0	0	1	1	1	1	1	0	0	2	0	2	0	0	0	0	1	0	-	0	0	0	1	0	0	1	0	0	0	0	0	-	0	0	1	1	1	0	0	0
Meligethes trapezithorax	0	0	0	-	0	-	-	-	-	0	0	1	1	1	1	1	0	0	0	0	2	0	0	0	1	1	0	-	0	0	0	1	0	0	1	0	0	0	0	0	-	0	0	1	1	1	0	0	0
Meligethes tricuspidatus	0	0	1	-	0	-	-	-	-	0	0	1	1	1	1	1	0	0	2	0	2	0	0	0	0	1	0	-	0	0	0	1	0	0	1	0	0	0	0	0	-	0	0	1	1	1	0	0	0
Meligethes wagneri	0	0	0	-	0	-	-	-	-	0	0	1	1	1	1	1	0	0	2	0	2	0	0	0	0	1	0	-	0	0	0	1	0	0	1	0	0	0	0	0	-	0	0	1	1	0	0	0	0
Meligethes xenogynus	0	0	0	-	1	-	-	-	-	0	0	1	1	1	1	1	1	0	2	0	2	0	1	0	0	1	0	-	0	0	0	1	0	0	0	0	0	0	0	0	-	0	0	1	1	0	0	0	0
[truncated: 25 more columns]
